# Supplementary material
Source: MDPI journal article supplement (https://www.mdpi.com/2071-1050/13/14/7546)
Supplement: s1 [file s1 › sustainability-1216496-supplementary.pdf]

## Supplementary Material

### 1. Structuring the Evaluation Model

**Table S1.** Constructed performance scale for each criterion.

| Dimension           | Criteria                                                        | Unit of the descriptor               | Type and Performance Scale                                                                                                                                                                                                |
|---------------------|-----------------------------------------------------------------|--------------------------------------|---------------------------------------------------------------------------------------------------------------------------------------------------------------------------------------------------------------------------|
| (E) Economic        | (E1) 2018-GDP per capita                                        | US \$                                | Four-level <i>quantitative</i> scale ranging from US \$3000 to US \$6000                                                                                                                                                  |
|                     | (E2) 2013-2018 Average GDP growth- 5 years                      | %                                    | Four-level <i>quantitative</i> scale ranging from 3% to 9%                                                                                                                                                                |
|                     | (E3) 2018 Poverty Index (PL)                                    | %                                    | Four-level <i>quantitative</i> scale ranging from 10% to 40%                                                                                                                                                              |
|                     | (E4) 2018 Financial Inclusion                                   | %                                    | Four-level <i>quantitative</i> scale ranging from 50% to 80%                                                                                                                                                              |
| (C) Commercial      | (C1) Potential off-grid households (without electricity access) | households                           | Four-level <i>quantitative</i> scale ranging from 20,000 to 80,000                                                                                                                                                        |
|                     | (C2) Dispersion index (potential off-grid households/area)      | number of households/km <sup>2</sup> | Three-level <i>quantitative</i> scale ranging from 0.1 to 1                                                                                                                                                               |
|                     | (C3) 2018 Rural Mobile phone ownership                          | %                                    | Four-level <i>quantitative</i> scale ranging from 40% to 70%                                                                                                                                                              |
|                     | (C4) Solar PV Investment-National rural electrification plan    | US \$M                               | Four-level <i>quantitative</i> scale ranging from US \$0M to US \$600M                                                                                                                                                    |
| (T) Technical       | (T1) Solar potential                                            | kWh/m <sup>2</sup>                   | Four-level <i>qualitative</i> scale:<br>Very High Potential: 4.5-5 kwh/m <sup>2</sup><br>High Potential: 4-4.5 kwh/m <sup>2</sup><br>Medium Potential: 3.5-4 kwh/m <sup>2</sup><br>Low Potential: <3.5 kWh/m <sup>2</sup> |
| (Env) Environmental | (Env1) Extension Protected Areas                                | %                                    | Four-level <i>quantitative</i> scale ranging from 0% to 15%                                                                                                                                                               |
|                     | (Env2) Average terrain elevation                                | m.a.s.l.                             | Four-level <i>quantitative</i> scale ranging from 50 to 110                                                                                                                                                               |
| (S) Social          | (S1) Rural Illiteracy rate                                      | %                                    | Four-level <i>quantitative</i> scale ranging from 5% to 15%                                                                                                                                                               |
|                     | (S2) Security Level (Global Peace Index)                        | points                               | Five-level <i>quantitative</i> scale ranging from 0 to 8                                                                                                                                                                  |

**Table S2.** Performance Profile of the Options (M-MACBETH software).

| Options | GDPcap | GDPg | Poverty | FInc | PHouseholds_woEA | Dispersion | MPhone_rur% | SolarPV_inv | Solar_kWh/m <sup>2</sup> | PAreas | Elev | Edu  | Security |
|---------|--------|------|---------|------|------------------|------------|-------------|-------------|--------------------------|--------|------|------|----------|
| PER     | 6,941  | 3.26 | 20.5    | 80   | 148,430          | 0.4        | 75          | 328,866,548 | Very High                | 16.93  | 235  | 14.6 | 6.8      |
| BOL     | 3,548  | 4.62 | 34.6    | 60   | 18,664           | 0.29       | 53.1        | 357,066,229 | Very High                | 16     | 100  | 17.6 | 6.2      |
| COL     | 6,668  | 2.85 | 27      | 82   | 81,960           | 3.93       | 87.5        | 413,269,543 | Very High                | 10.83  | 50   | 12.6 | 6.6      |

## 2. Building the Evaluation Model

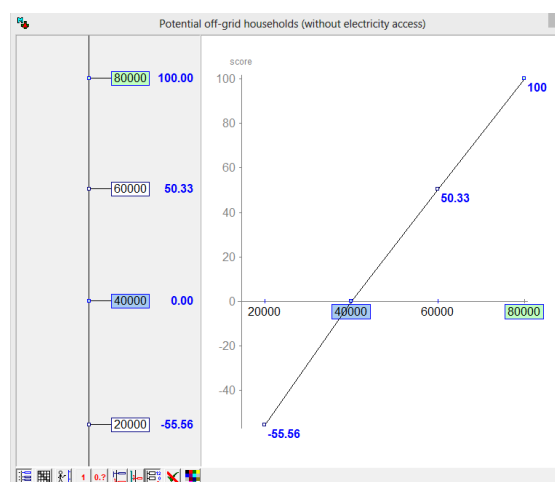**Figure S1.** Value function for the “Potential off-grid households” criterion (M-MACBETH software).

|       | 80000 | 60000 | 40000  | 20000     | Current scale |
|-------|-------|-------|--------|-----------|---------------|
| 80000 |       | no    | strong | extreme   | 100.00        |
| 60000 |       |       | no     | v. strong | 50.33         |
| 40000 |       |       |        | no        | 0.00          |
| 20000 |       |       |        |           | -55.56        |

Figure S2. Matrix of judgments for the “Potential off-grid households” criterion (M-MACBETH software).

### 2.1. Estimating the Weighting Coefficients: Simple Weighting Questionnaire

**Instructions:** Imagine an option exists that is neutral in every criterion:

1. How much would a swing from neutral to good in the *Potential off-grid households* increase its overall attractiveness?

Table S3. MACBETH categories used by the DM to model the differences in preference.

|         |  |             |  |          |  |        |  |      |  |           |  |    |
|---------|--|-------------|--|----------|--|--------|--|------|--|-----------|--|----|
| Extreme |  | Very strong |  | Moderate |  | Strong |  | Weak |  | Very weak |  | No |
|---------|--|-------------|--|----------|--|--------|--|------|--|-----------|--|----|

A similar question was subsequently asked for each of the other criteria, thus completing the last column of the judgments weighting matrix, as follows:

|                      | [ Finc ] | [ SolarPV_inv ] | [ Security ] | [ Solar_kwh/m2 ] | [ PAreas ] | [ Elev ] | [ NEUTRAL ] |
|----------------------|----------|-----------------|--------------|------------------|------------|----------|-------------|
| [ PHouseholds_woEA ] | ?        | ?               | ?            | ?                | ?          | ?        | extreme     |
| [ Dispersion ]       | ?        | ?               | ?            | ?                | ?          | ?        | v. strong   |
| [ GDPg ]             | ?        | ?               | ?            | ?                | ?          | ?        | strong      |
| [ GDPcap ]           | ?        | ?               | ?            | ?                | ?          | ?        | moderate    |
| [ Poverty ]          | ?        | ?               | ?            | ?                | ?          | ?        | weak        |
| [ MPhone_rur% ]      | ?        | ?               | ?            | ?                | ?          | ?        | very weak   |
| [ Edu ]              | ?        | ?               | ?            | ?                | ?          | ?        | no          |
| [ Finc ]             |          | ?               | ?            | ?                | ?          | ?        | extreme     |
| [ SolarPV_inv ]      | ?        |                 | ?            | ?                | ?          | ?        | v. strong   |
| [ Security ]         | ?        | ?               |              | ?                | ?          | ?        | strong      |
| [ Solar_kwh/m2 ]     | ?        | ?               | ?            |                  | ?          | ?        | moderate    |
| [ PAreas ]           | ?        | ?               | ?            | ?                |            | ?        | moderate    |
| [ Elev ]             | ?        | ?               | ?            | ?                | ?          |          | weak        |
| [ NEUTRAL ]          | ?        | ?               | ?            | ?                | ?          | ?        | weak        |

Figure S3. Weighting matrix of judgments (M-MACBETH software).

The next step was to elicit qualitative judgments from the decision maker regarding the difference of attractiveness between swings. It began with the comparison of the most attractive swing to the second most attractive swing, by asking:

2. How much more attractive is a swing from neutral to good in *Potential off-grid households* than in *Dispersion Index*?

A similar comparison was subsequently made between the swing in *Potential off-grid households* and each of the other swings, thus completing (from left to right) the first row of the weighting matrix. This process was then repeated row-by-row, until the weighting matrix of judgements was completed. The consistency checks were automatically made each time a judgement was entered into the matrix. The MACBETH software then created the weighting scale for each criterion.

**Table S4.** Final weighing matrix of judgments and associated weighting scale.

|                             | [Finc]    | [SolarPV_inv] | [Security] | [Solar_kWh/m <sup>2</sup> ] | [PAreas]  | [Elev]    | [NEUTRAL] | Current Scale |             |
|-----------------------------|-----------|---------------|------------|-----------------------------|-----------|-----------|-----------|---------------|-------------|
| [PHouseholds_woEA]          | V. Strong | Extreme       | Extreme    | Extreme                     | Extreme   | Extreme   | Extreme   | 18.47         | Extreme     |
| [Dispersion]                | V. Strong | V. Strong     | V. Strong  | V. Strong                   | V. Strong | V. Strong | Extreme   | 16.52         | Very strong |
| [GDPg]                      | V. Strong | V. Strong     | V. Strong  | V. Strong                   | V. Strong | V. Strong | V. Strong | 12.71         | Moderate    |
| [GDPcap]                    | V. Strong | V. Strong     | V. Strong  | V. Strong                   | V. Strong | V. Strong | V. Strong | 12.71         | Strong      |
| [Poverty]                   | Strong    | V. Strong     | V. Strong  | V. Strong                   | V. Strong | V. Strong | V. Strong | 11.52         | Weak        |
| [MPhone_rur%]               | Moderate  | V. Strong     | V. Strong  | V. Strong                   | V. Strong | V. Strong | V. Strong | 8.91          | Very weak   |
| [Edu]                       | Moderate  | Strong        | Strong     | Strong                      | Strong    | V. Strong | V. Strong | 7.83          | No          |
| [Finc]                      | No        | Weak          | Moderate   | Strong                      | Strong    | Strong    | Strong    | 5.22          |             |
| [SolarPV_inv]               |           | No            | Weak       | Weak                        | Weak-Mod  | Moderate  | Moderate  | 1.85          |             |
| [Security]                  |           |               | No         | Weak                        | Weak      | Weak      | Moderate  | 1.53          |             |
| [Solar_kWh/m <sup>2</sup> ] |           |               |            | No                          | Weak      | Weak      | Moderate  | 1.20          |             |
| [PAreas]                    |           |               |            |                             | No        | V. Weak   | Weak      | 0.87          |             |
| [Elev]                      |           |               |            |                             |           | No        | Weak      | 0.66          |             |
| [NEUTRAL]                   |           |               |            |                             |           |           | No        |               |             |
| Consistent judgements       |           |               |            |                             |           |           |           |               |             |

**Figure S4.** Table of rankings for each criterion (M-MACBETH software).

| Table of rankings |      |         |      |                  |            |             |             |              |        |      |     |          |
|-------------------|------|---------|------|------------------|------------|-------------|-------------|--------------|--------|------|-----|----------|
| GDPcap            | GDPg | Poverty | Finc | PHouseholds_woEA | Dispersion | MPhone_rur% | SolarPV_inv | Solar_kwh/m2 | PAreas | Elev | Edu | Security |
| PER               | 7    | 20      | COL  | PER              | COL        | COL         | COL         | VHigh        | 0      | 50   | 5   | 0        |
| COL               | BOL  | PER     | 80   | COL              | 1          | PER         | 400000000   | PER          | 10     | COL  | 10  | 4        |
| 6000              | PER  | COL     | PER  | 80000            | 0.5        | 60          | BOL         | BOL          | COL    | BOL  | COL | BOL      |
| 5000              | 3    | 30      | 60   | 40000            | PER        | BOL         | PER         | COL          | BOL    | 110  | PER | COL      |
| BOL               | COL  | BOL     | BOL  | BOL              | BOL        | 50          | 200000000   | Med          | PER    | PER  | BOL | PER      |
